# Supplementary material
Source: publisher figshare collection journal article supplement (https://sage.figshare.com/ndownloader/files/16636703)
Supplement: Supplementary file 1 [file 16636703]

## Supplementary Material

**Table S1.** Risk of bias assessment for randomized-controlled trials.

| Study Details    |      | Randomization | Adherence to intervention | Missing outcome data | Measurement of outcome | Reported result | Overall risk of bias |
|------------------|------|---------------|---------------------------|----------------------|------------------------|-----------------|----------------------|
| Sacchetti et al. | 2009 |               |                           |                      |                        |                 |                      |
| Bitter et al.    | 2004 |               |                           |                      |                        |                 |                      |
| Tollefson et al. | 2001 |               |                           |                      |                        |                 |                      |
| Rosenheck et al. | 1997 |               |                           |                      |                        |                 |                      |
| Kumra et al.     | 1996 |               |                           |                      |                        |                 |                      |
| Kane et al.      | 1988 |               |                           |                      |                        |                 |                      |

Risk of bias assessment ratings: unclear, low, moderate, high.

**Table S2.** Risk of bias assessments for non-randomized studies.

| Study details       |      |                      |
|---------------------|------|----------------------|
| Author              | Year | Overall risk of bias |
| Li et al.           | 2009 | Serious              |
| Strous et al.       | 2006 | Serious              |
| Raguraman et al.    | 2005 | Serious              |
| Lin et al.          | 2003 | Moderate             |
| Sajatovic et al.    | 2000 | Serious              |
| Spivak et al.       | 1997 | Low                  |
| Kane et al.         | 1993 | Serious              |
| Littrell and Magill | 1993 | Moderate             |
| Moore et al.        | 1992 | Low                  |
| Small and Marhenke  | 1987 | Moderate             |
| Dalack et al.       | 1998 | Serious              |
| Johnson et al.      | 1994 | Serious              |
